# Supplementary material for: Stability of SF-36 profiles between 2007 and 2016: A study of 27,302 patients surgically treated for lumbar spine diseases
Source: Springer Nature journal article supplement (doi:10.1186/s12955-022-01999-7), 2022-06-07
Supplement: MOESM1 [file 23135728]

**Table S1** Characteristics of excluded patients.

|                       | <b>LSS with DS</b> | <b>LSS without DS</b> | <b>LDH</b>  |
|-----------------------|--------------------|-----------------------|-------------|
| <b>n</b>              | 3292               | 10966                 | 9145        |
| <b>Age, mean (SD)</b> | 68.8 (10.1)        | 68.6 (11.5)           | 43.4 (13.4) |
| <b>BMI, mean (SD)</b> | 27.5 (4.4)         | 27.8 (4.3)            | 26.6 (4.4)  |
| <b>Women, n (%)</b>   | 2358 (71.6)        | 5551 (50.6)           | 3937 (43.1) |

**Table S2a** Preoperative and 1-year postoperative SF-36 data (mean and 95% CIs) for patients treated surgically for LSS with DS from 2007 to 2016.

|                 |               | PF               | RP               | BP              | GH                  | VT               | SF               | RE               | MH               |
|-----------------|---------------|------------------|------------------|-----------------|---------------------|------------------|------------------|------------------|------------------|
| 2007<br>(n=381) | <b>preop</b>  | 35 (33;37)       | 10 (7.9;13)      | 29 (28;31)      | 61 (59;63)          | 38 (36;41)       | 56 (54;59)       | 37 (33;42)       | 64 (62;66)       |
|                 | <b>year 1</b> | 59 (57;62)       | 46 (41;50)       | 56 (53;58)      | 64 (61;66)          | 57 (54;59)       | 77 (74;79)       | 64 (60;68)       | 75 (73;77)       |
|                 | <b>diff</b>   | 24 (22;27)       | 35 (31;40)       | 26 (24;29)      | 2.5 (0.59;4.3)      | 18 (16;21)       | 20 (17;23)       | 26 (22;31)       | 10 (8.3;13)      |
|                 | <b>srm</b>    | 0.98 (0.86;1.1)  | 0.82 (0.7;0.93)  | 0.99 (0.87;1.1) | 0.13 (0.034;0.24)   | 0.75 (0.64;0.87) | 0.73 (0.62;0.85) | 0.55 (0.44;0.66) | 0.48 (0.38;0.59) |
| 2008<br>(n=409) | <b>preop</b>  | 35 (33;37)       | 12 (10;15)       | 27 (25;28)      | 59 (57;61)          | 40 (38;42)       | 54 (51;57)       | 39 (34;43)       | 65 (63;67)       |
|                 | <b>year 1</b> | 57 (55;59)       | 44 (40;48)       | 55 (52;57)      | 62 (59;64)          | 57 (54;60)       | 76 (74;79)       | 64 (59;68)       | 75 (72;77)       |
|                 | <b>diff</b>   | 22 (20;25)       | 31 (27;35)       | 28 (25;31)      | 2.2 (0.19;4.1)      | 17 (15;19)       | 22 (19;25)       | 25 (20;30)       | 9.6 (7.5;12)     |
|                 | <b>srm</b>    | 0.82 (0.71;0.94) | 0.73 (0.62;0.84) | 1.1 (0.93;1.2)  | 0.11 (0.013;0.21)   | 0.71 (0.6;0.82)  | 0.73 (0.62;0.84) | 0.48 (0.38;0.58) | 0.45 (0.35;0.55) |
| 2009<br>(n=425) | <b>preop</b>  | 34 (32;36)       | 13 (10;15)       | 27 (26;28)      | 58 (56;60)          | 37 (35;39)       | 56 (54;59)       | 45 (40;48)       | 65 (63;67)       |
|                 | <b>year 1</b> | 57 (55;60)       | 43 (39;47)       | 55 (52;57)      | 62 (60;64)          | 55 (52;57)       | 76 (73;78)       | 64 (60;69)       | 75 (72;77)       |
|                 | <b>diff</b>   | 23 (21;25)       | 30 (26;35)       | 28 (26;30)      | 3.3 (1.5;5.2)       | 18 (15;20)       | 20 (17;22)       | 20 (15;25)       | 9.8 (7.7;12)     |
|                 | <b>srm</b>    | 1 (0.88;1.1)     | 0.67 (0.56;0.77) | 1.1 (0.99;1.2)  | 0.17 (0.073;0.26)   | 0.69 (0.59;0.8)  | 0.7 (0.59;0.81)  | 0.4 (0.3;0.5)    | 0.45 (0.35;0.55) |
| 2010<br>(n=473) | <b>preop</b>  | 35 (33;36)       | 11 (8.9;13)      | 26 (25;28)      | 58 (57;60)          | 38 (36;40)       | 54 (51;56)       | 44 (40;48)       | 65 (63;67)       |
|                 | <b>year 1</b> | 58 (56;61)       | 46 (42;50)       | 55 (52;57)      | 63 (60;65)          | 55 (53;57)       | 77 (74;79)       | 64 (60;68)       | 76 (74;77)       |
|                 | <b>diff</b>   | 24 (21;26)       | 35 (31;39)       | 29 (26;31)      | 4.1 (2.5;5.8)       | 17 (15;19)       | 23 (20;25)       | 20 (16;24)       | 11 (8.7;12)      |
|                 | <b>srm</b>    | 0.95 (0.84;1.1)  | 0.81 (0.71;0.91) | 1.1 (0.95;1.2)  | 0.22 (0.13;0.31)    | 0.7 (0.6;0.8)    | 0.83 (0.72;0.93) | 0.43 (0.34;0.53) | 0.55 (0.45;0.64) |
| 2011<br>(n=490) | <b>preop</b>  | 36 (34;37)       | 14 (12;17)       | 26 (25;28)      | 60 (59;62)          | 38 (36;40)       | 56 (54;59)       | 43 (39;47)       | 64 (62;66)       |
|                 | <b>year 1</b> | 58 (56;61)       | 47 (43;51)       | 54 (51;56)      | 63 (61;65)          | 53 (51;55)       | 74 (71;77)       | 63 (59;67)       | 74 (72;76)       |
|                 | <b>diff</b>   | 23 (20;25)       | 33 (29;37)       | 27 (25;30)      | 2.7 (0.93;4.4)      | 15 (13;17)       | 18 (15;21)       | 21 (16;25)       | 9.8 (8.1;12)     |
|                 | <b>srm</b>    | 0.96 (0.86;1.1)  | 0.72 (0.62;0.82) | 1 (0.92;1.1)    | 0.14 (0.052;0.23)   | 0.66 (0.56;0.75) | 0.6 (0.51;0.7)   | 0.41 (0.32;0.5)  | 0.5 (0.41;0.6)   |
| 2012<br>(n=450) | <b>preop</b>  | 36 (34;38)       | 12 (9.8;15)      | 28 (26;29)      | 61 (59;63)          | 40 (38;42)       | 58 (55;61)       | 47 (42;51)       | 67 (65;68)       |
|                 | <b>year 1</b> | 59 (57;62)       | 47 (43;51)       | 55 (53;58)      | 63 (61;65)          | 55 (53;58)       | 75 (73;78)       | 65 (62;69)       | 75 (73;77)       |
|                 | <b>diff</b>   | 23 (21;25)       | 34 (30;39)       | 28 (25;30)      | 1.6 (-0.1;3.2)      | 15 (13;18)       | 18 (15;20)       | 19 (14;24)       | 8.1 (6.2;9.9)    |
|                 | <b>srm</b>    | 0.93 (0.82;1)    | 0.75 (0.65;0.86) | 1 (0.93;1.2)    | 0.09 (-0.0022;0.18) | 0.67 (0.56;0.77) | 0.63 (0.53;0.73) | 0.36 (0.26;0.45) | 0.41 (0.31;0.51) |
| 2013<br>(n=560) | <b>preop</b>  | 37 (35;38)       | 14 (11;16)       | 28 (26;29)      | 59 (57;60)          | 39 (38;41)       | 56 (54;59)       | 41 (37;44)       | 65 (63;66)       |
|                 | <b>year 1</b> | 60 (58;62)       | 46 (42;50)       | 55 (52;57)      | 62 (60;63)          | 55 (53;57)       | 75 (73;77)       | 64 (60;68)       | 74 (72;76)       |
|                 | <b>diff</b>   | 23 (21;25)       | 33 (29;36)       | 27 (25;29)      | 3 (1.3;4.6)         | 16 (14;18)       | 18 (16;21)       | 23 (19;27)       | 9.1 (7.5;11)     |
|                 | <b>srm</b>    | 0.95 (0.85;1)    | 0.69 (0.6;0.78)  | 1 (0.9;1.1)     | 0.14 (0.06;0.23)    | 0.64 (0.54;0.73) | 0.63 (0.54;0.72) | 0.48 (0.39;0.56) | 0.46 (0.37;0.54) |
| 2014<br>(n=574) | <b>preop</b>  | 38 (36;40)       | 15 (12;17)       | 28 (26;29)      | 59 (58;61)          | 38 (36;40)       | 57 (54;59)       | 43 (39;46)       | 65 (64;67)       |
|                 | <b>year 1</b> | 59 (57;61)       | 46 (42;49)       | 53 (51;55)      | 62 (60;63)          | 54 (52;56)       | 76 (73;78)       | 64 (60;67)       | 74 (72;75)       |
|                 | <b>diff</b>   | 21 (19;23)       | 31 (27;35)       | 25 (23;27)      | 2.6 (1.1;4.1)       | 16 (14;18)       | 19 (17;22)       | 21 (17;25)       | 8.3 (6.6;9.9)    |
|                 | <b>srm</b>    | 0.84 (0.75;0.94) | 0.68 (0.59;0.77) | 0.96 (0.86;1.1) | 0.13 (0.051;0.22)   | 0.68 (0.59;0.77) | 0.66 (0.57;0.75) | 0.41 (0.32;0.49) | 0.41 (0.33;0.5)  |
| 2015<br>(n=478) | <b>preop</b>  | 38 (37;40)       | 13 (10;15)       | 26 (25;27)      | 60 (59;62)          | 39 (37;41)       | 57 (54;59)       | 43 (39;47)       | 66 (64;67)       |
|                 | <b>year 1</b> | 62 (60;65)       | 51 (48;55)       | 54 (52;57)      | 64 (62;65)          | 56 (54;58)       | 77 (75;79)       | 67 (64;71)       | 75 (74;77)       |
|                 | <b>diff</b>   | 24 (22;26)       | 39 (35;42)       | 29 (26;31)      | 3.2 (1.5;5)         | 17 (15;19)       | 20 (17;23)       | 24 (19;29)       | 9.7 (7.9;12)     |
|                 | <b>srm</b>    | 0.98 (0.87;1.1)  | 0.86 (0.75;0.96) | 1.1 (0.94;1.2)  | 0.17 (0.078;0.26)   | 0.7 (0.6;0.8)    | 0.67 (0.57;0.77) | 0.46 (0.36;0.55) | 0.46 (0.36;0.55) |
| 2016<br>(n=587) | <b>preop</b>  | 39 (37;41)       | 16 (14;19)       | 27 (26;28)      | 61 (59;62)          | 41 (39;42)       | 57 (55;59)       | 45 (41;48)       | 66 (65;68)       |
|                 | <b>year 1</b> | 60 (58;62)       | 48 (45;52)       | 53 (51;55)      | 63 (61;65)          | 55 (53;57)       | 76 (74;78)       | 66 (63;70)       | 75 (73;76)       |
|                 | <b>diff</b>   | 21 (19;23)       | 32 (29;36)       | 26 (24;28)      | 2.2 (0.67;3.8)      | 14 (12;16)       | 19 (17;21)       | 22 (18;26)       | 8.6 (7;10)       |
|                 | <b>srm</b>    | 0.88 (0.79;0.98) | 0.73 (0.64;0.82) | 0.99 (0.89;1.1) | 0.12 (0.035;0.2)    | 0.6 (0.51;0.69)  | 0.68 (0.59;0.77) | 0.45 (0.37;0.53) | 0.42 (0.34;0.51) |

**Table S2b** Preoperative and 1-year postoperative SF-36 data (mean and 95% CIs) for patients treated surgically for LSS without DS from 2007 to 2016.

|                  |               | PF               | RP               | BP               | GH                  | VT               | SF               | RE               | MH               |
|------------------|---------------|------------------|------------------|------------------|---------------------|------------------|------------------|------------------|------------------|
| 2007<br>(n=815)  | <b>preop</b>  | 35 (34;37)       | 13 (11;15)       | 29 (28;31)       | 59 (58;61)          | 40 (39;42)       | 57 (55;59)       | 40 (37;43)       | 65 (63;66)       |
|                  | <b>year 1</b> | 56 (54;58)       | 41 (37;44)       | 54 (52;55)       | 59 (58;61)          | 54 (53;56)       | 74 (72;76)       | 60 (57;63)       | 74 (72;75)       |
|                  | <b>diff</b>   | 21 (19;23)       | 28 (25;31)       | 24 (22;26)       | 0.15 (-1.2;1.6)     | 14 (12;16)       | 17 (15;19)       | 20 (17;23)       | 9.2 (7.8;11)     |
|                  | <b>srm</b>    | 0.85 (0.77;0.93) | 0.64 (0.56;0.71) | 0.94 (0.85;1)    | 0.01 (-0.061;0.076) | 0.58 (0.5;0.65)  | 0.62 (0.54;0.69) | 0.4 (0.33;0.47)  | 0.46 (0.39;0.54) |
| 2008<br>(n=928)  | <b>preop</b>  | 35 (34;36)       | 12 (11;14)       | 28 (27;29)       | 60 (59;61)          | 40 (38;41)       | 57 (55;59)       | 42 (39;45)       | 66 (64;67)       |
|                  | <b>year 1</b> | 56 (55;58)       | 43 (40;45)       | 53 (52;55)       | 60 (59;62)          | 53 (52;55)       | 74 (72;76)       | 62 (59;64)       | 73 (72;75)       |
|                  | <b>diff</b>   | 21 (20;23)       | 30 (28;33)       | 25 (24;27)       | 0.18 (-0.98;1.5)    | 14 (12;15)       | 17 (15;19)       | 19 (16;22)       | 7.7 (6.3;9)      |
|                  | <b>srm</b>    | 0.86 (0.79;0.94) | 0.68 (0.61;0.75) | 0.93 (0.86;1)    | 0.01 (-0.055;0.07)  | 0.59 (0.52;0.66) | 0.57 (0.5;0.64)  | 0.4 (0.34;0.47)  | 0.37 (0.31;0.44) |
| 2009<br>(n=1136) | <b>preop</b>  | 37 (36;38)       | 14 (12;16)       | 29 (28;30)       | 60 (59;62)          | 40 (39;42)       | 58 (56;60)       | 44 (41;46)       | 65 (64;66)       |
|                  | <b>year 1</b> | 57 (56;59)       | 42 (40;45)       | 53 (52;55)       | 61 (60;62)          | 55 (53;56)       | 75 (73;76)       | 63 (60;65)       | 74 (73;75)       |
|                  | <b>diff</b>   | 20 (19;22)       | 28 (26;31)       | 24 (23;26)       | 0.72 (-0.41;1.9)    | 14 (13;16)       | 17 (15;18)       | 19 (16;22)       | 9.2 (8.1;10)     |
|                  | <b>srm</b>    | 0.81 (0.75;0.88) | 0.63 (0.57;0.69) | 0.93 (0.86;1)    | 0.036 (-0.02;0.094) | 0.58 (0.52;0.65) | 0.59 (0.53;0.65) | 0.39 (0.33;0.45) | 0.46 (0.4;0.52)  |
| 2010<br>(n=1189) | <b>preop</b>  | 36 (35;37)       | 13 (12;15)       | 29 (28;30)       | 60 (59;62)          | 40 (39;41)       | 57 (55;58)       | 41 (38;43)       | 65 (64;67)       |
|                  | <b>year 1</b> | 56 (54;57)       | 42 (40;45)       | 53 (51;54)       | 60 (59;62)          | 53 (52;55)       | 74 (72;75)       | 60 (58;63)       | 73 (72;74)       |
|                  | <b>diff</b>   | 20 (19;21)       | 29 (26;31)       | 23 (22;25)       | -0.056 (-1.1;1)     | 13 (12;14)       | 17 (15;18)       | 20 (17;22)       | 7.6 (6.5;8.8)    |
|                  | <b>srm</b>    | 0.8 (0.73;0.86)  | 0.64 (0.57;0.7)  | 0.87 (0.8;0.93)  | -0.003 (-0.06;0.05) | 0.56 (0.5;0.62)  | 0.58 (0.52;0.64) | 0.39 (0.33;0.45) | 0.38 (0.32;0.44) |
| 2011<br>(n=1341) | <b>preop</b>  | 36 (35;37)       | 13 (12;15)       | 30 (29;30)       | 60 (59;61)          | 40 (39;41)       | 58 (56;59)       | 41 (39;44)       | 66 (65;67)       |
|                  | <b>year 1</b> | 57 (56;59)       | 43 (41;45)       | 53 (51;54)       | 61 (60;62)          | 54 (53;55)       | 75 (73;76)       | 62 (59;64)       | 74 (73;75)       |
|                  | <b>diff</b>   | 21 (20;22)       | 30 (27;32)       | 23 (22;25)       | 0.61 (-0.46;1.7)    | 14 (13;15)       | 17 (16;19)       | 20 (18;23)       | 8.5 (7.4;9.6)    |
|                  | <b>srm</b>    | 0.85 (0.79;0.91) | 0.67 (0.61;0.73) | 0.9 (0.84;0.96)  | 0.03 (-0.023;0.084) | 0.57 (0.52;0.63) | 0.59 (0.53;0.65) | 0.4 (0.34;0.45)  | 0.4 (0.34;0.45)  |
| 2012<br>(n=1377) | <b>preop</b>  | 36 (35;37)       | 13 (11;14)       | 29 (28;30)       | 59 (58;60)          | 40 (39;41)       | 58 (56;59)       | 42 (40;44)       | 65 (64;66)       |
|                  | <b>year 1</b> | 57 (55;58)       | 43 (40;45)       | 52 (51;54)       | 59 (58;61)          | 53 (52;55)       | 74 (72;75)       | 60 (58;62)       | 73 (71;74)       |
|                  | <b>diff</b>   | 21 (19;22)       | 30 (28;32)       | 23 (22;25)       | 0.12 (-0.89;1.2)    | 13 (12;14)       | 16 (15;18)       | 18 (15;21)       | 7.4 (6.3;8.4)    |
|                  | <b>srm</b>    | 0.83 (0.77;0.89) | 0.67 (0.62;0.73) | 0.9 (0.84;0.96)  | 0.006 (-0.05;0.06)  | 0.56 (0.5;0.62)  | 0.56 (0.5;0.61)  | 0.35 (0.3;0.41)  | 0.35 (0.3;0.41)  |
| 2013<br>(n=1459) | <b>preop</b>  | 37 (36;38)       | 12 (11;14)       | 29 (28;29)       | 60 (59;61)          | 41 (40;42)       | 58 (57;60)       | 42 (40;45)       | 67 (66;68)       |
|                  | <b>year 1</b> | 58 (57;59)       | 43 (41;45)       | 54 (52;55)       | 61 (60;62)          | 55 (54;56)       | 75 (73;76)       | 62 (60;64)       | 74 (73;75)       |
|                  | <b>diff</b>   | 21 (20;23)       | 31 (29;33)       | 25 (24;27)       | 0.83 (-0.19;1.8)    | 14 (13;15)       | 16 (15;18)       | 20 (17;22)       | 7.7 (6.6;8.7)    |
|                  | <b>srm</b>    | 0.85 (0.79;0.91) | 0.69 (0.63;0.75) | 0.95 (0.89;1)    | 0.041 (-0.01;0.1)   | 0.6 (0.55;0.66)  | 0.57 (0.51;0.62) | 0.39 (0.34;0.44) | 0.37 (0.32;0.43) |
| 2014<br>(n=1632) | <b>preop</b>  | 38 (37;39)       | 16 (15;18)       | 30 (29;30)       | 61 (60;62)          | 41 (40;42)       | 60 (58;61)       | 44 (42;46)       | 67 (66;68)       |
|                  | <b>year 1</b> | 59 (58;60)       | 44 (42;46)       | 53 (52;54)       | 60 (59;61)          | 55 (54;56)       | 75 (74;77)       | 61 (59;64)       | 75 (74;76)       |
|                  | <b>diff</b>   | 21 (19;22)       | 28 (26;30)       | 23 (22;25)       | -0.44 (-1.5;0.48)   | 14 (13;15)       | 16 (14;17)       | 18 (15;20)       | 7.3 (6.3;8.4)    |
|                  | <b>srm</b>    | 0.78 (0.72;0.83) | 0.6 (0.55;0.66)  | 0.84 (0.78;0.89) | -0.02 (-0.07;0.03)  | 0.58 (0.53;0.63) | 0.54 (0.49;0.59) | 0.35 (0.3;0.4)   | 0.35 (0.3;0.4)   |
| 2015<br>(n=1773) | <b>preop</b>  | 38 (37;39)       | 15 (13;16)       | 28 (27;28)       | 60 (59;60)          | 40 (39;41)       | 58 (57;60)       | 42 (40;44)       | 66 (65;67)       |
|                  | <b>year 1</b> | 58 (57;60)       | 44 (42;46)       | 52 (51;54)       | 60 (59;61)          | 54 (53;55)       | 75 (73;76)       | 63 (61;65)       | 74 (73;75)       |
|                  | <b>diff</b>   | 20 (19;22)       | 29 (27;31)       | 25 (24;26)       | 0.27 (-0.64;1.2)    | 14 (13;15)       | 16 (15;18)       | 21 (19;24)       | 7.7 (6.8;8.7)    |
|                  | <b>srm</b>    | 0.78 (0.72;0.83) | 0.64 (0.59;0.69) | 0.91 (0.85;0.96) | 0.014 (-0.033;0.06) | 0.58 (0.53;0.63) | 0.56 (0.51;0.61) | 0.42 (0.37;0.47) | 0.38 (0.33;0.43) |
| 2016<br>(n=1893) | <b>preop</b>  | 39 (38;40)       | 15 (13;16)       | 28 (28;29)       | 60 (59;61)          | 40 (39;41)       | 59 (57;60)       | 43 (41;45)       | 66 (65;67)       |
|                  | <b>year 1</b> | 60 (59;62)       | 47 (45;49)       | 54 (52;55)       | 61 (60;62)          | 55 (54;57)       | 76 (74;77)       | 65 (63;67)       | 74 (73;75)       |
|                  | <b>diff</b>   | 22 (21;23)       | 33 (31;35)       | 26 (24;27)       | 0.68 (-0.2;1.6)     | 15 (14;16)       | 17 (16;18)       | 22 (20;24)       | 8.3 (7.3;9.2)    |
|                  | <b>srm</b>    | 0.85 (0.8;0.9)   | 0.72 (0.67;0.77) | 0.93 (0.88;0.99) | 0.035 (-0.01;0.08)  | 0.62 (0.57;0.67) | 0.6 (0.55;0.65)  | 0.44 (0.39;0.49) | 0.41 (0.36;0.46) |

**Table S2c** Preoperative and 1-year postoperative SF-36 data (mean and 95% CIs) for patients treated surgically for LDH from 2007 to 2016.

|                 |               | PF            | RP            | BP            | GH                  | VT               | SF             | RE               | MH               |
|-----------------|---------------|---------------|---------------|---------------|---------------------|------------------|----------------|------------------|------------------|
| 2007<br>(n=806) | <b>preop</b>  | 40 (39;42)    | 9.4 (7.9;11)  | 23 (22;24)    | 68 (67;70)          | 34 (32;35)       | 48 (46;50)     | 43 (40;47)       | 60 (58;61)       |
|                 | <b>year 1</b> | 77 (76;78)    | 62 (60;65)    | 64 (62;66)    | 70 (68;72)          | 60 (58;61)       | 82 (80;84)     | 77 (74;79)       | 77 (76;79)       |
|                 | <b>diff</b>   | 37 (35;39)    | 53 (50;56)    | 41 (39;43)    | 2 (0.48;3.4)        | 26 (24;28)       | 34 (31;36)     | 33 (30;37)       | 17 (16;19)       |
|                 | <b>srm</b>    | 1.4 (1.3;1.5) | 1.2 (1.1;1.3) | 1.4 (1.3;1.5) | 0.099 (0.03;0.17)   | 0.97 (0.89;1.1)  | 1 (0.93;1.1)   | 0.67 (0.59;0.74) | 0.81 (0.73;0.89) |
| 2008<br>(n=883) | <b>preop</b>  | 38 (37;40)    | 9.6 (8;11)    | 23 (22;24)    | 67 (66;68)          | 35 (33;36)       | 48 (46;49)     | 45 (42;48)       | 61 (59;62)       |
|                 | <b>year 1</b> | 76 (74;77)    | 63 (60;65)    | 63 (61;64)    | 69 (67;70)          | 59 (57;60)       | 82 (81;84)     | 78 (76;81)       | 76 (75;78)       |
|                 | <b>diff</b>   | 38 (36;39)    | 53 (50;56)    | 40 (38;42)    | 1.9 (0.51;3.3)      | 24 (22;26)       | 35 (33;37)     | 34 (30;37)       | 15 (14;17)       |
|                 | <b>srm</b>    | 1.4 (1.3;1.4) | 1.1 (1.1;1.2) | 1.3 (1.2;1.4) | 0.09 (0.024;0.16)   | 0.86 (0.79;0.94) | 1 (0.96;1.1)   | 0.65 (0.58;0.73) | 0.67 (0.6;0.74)  |
| 2009<br>(n=892) | <b>preop</b>  | 40 (39;42)    | 10 (8.6;12)   | 23 (21;24)    | 67 (66;69)          | 33 (32;35)       | 48 (46;50)     | 45 (42;48)       | 61 (59;62)       |
|                 | <b>year 1</b> | 76 (75;78)    | 62 (60;65)    | 63 (61;65)    | 70 (68;71)          | 60 (58;61)       | 82 (80;83)     | 75 (73;78)       | 76 (75;78)       |
|                 | <b>diff</b>   | 36 (34;38)    | 52 (49;55)    | 41 (39;43)    | 2.7 (1.4;4.1)       | 26 (25;28)       | 34 (32;36)     | 30 (27;33)       | 16 (14;17)       |
|                 | <b>srm</b>    | 1.3 (1.2;1.4) | 1.2 (1.1;1.3) | 1.4 (1.3;1.5) | 0.14 (0.073;0.2)    | 1 (0.93;1.1)     | 1 (0.96;1.1)   | 0.61 (0.53;0.68) | 0.71 (0.64;0.78) |
| 2010<br>(n=868) | <b>preop</b>  | 40 (38;41)    | 8.9 (7.5;10)  | 22 (21;23)    | 68 (66;69)          | 33 (32;34)       | 46 (44;48)     | 42 (39;45)       | 60 (59;62)       |
|                 | <b>year 1</b> | 77 (75;78)    | 62 (60;65)    | 62 (61;64)    | 70 (68;71)          | 59 (57;61)       | 82 (81;84)     | 77 (75;80)       | 77 (75;78)       |
|                 | <b>diff</b>   | 37 (35;39)    | 53 (51;56)    | 40 (38;42)    | 2.1 (0.68;3.5)      | 26 (24;28)       | 36 (34;38)     | 35 (32;39)       | 17 (15;18)       |
|                 | <b>srm</b>    | 1.3 (1.2;1.4) | 1.2 (1.1;1.3) | 1.3 (1.3;1.4) | 0.097 (0.03;0.16)   | 0.97 (0.89;1.1)  | 1.2 (1.1;1.2)  | 0.71 (0.64;0.79) | 0.72 (0.64;0.79) |
| 2011<br>(n=890) | <b>preop</b>  | 39 (38;41)    | 9.8 (8.3;11)  | 22 (21;23)    | 66 (65;68)          | 33 (32;35)       | 47 (45;49)     | 43 (40;46)       | 61 (60;62)       |
|                 | <b>year 1</b> | 77 (76;79)    | 63 (60;66)    | 63 (61;64)    | 70 (68;71)          | 59 (57;61)       | 83 (81;84)     | 78 (75;80)       | 77 (75;78)       |
|                 | <b>diff</b>   | 38 (36;40)    | 53 (50;56)    | 40 (38;42)    | 3.6 (2.3;5)         | 26 (24;27)       | 36 (34;38)     | 35 (32;38)       | 16 (14;17)       |
|                 | <b>srm</b>    | 1.4 (1.3;1.5) | 1.2 (1.1;1.3) | 1.4 (1.3;1.5) | 0.18 (0.11;0.24)    | 0.99 (0.91;1.1)  | 1.1 (1;1.2)    | 0.7 (0.63;0.77)  | 0.72 (0.64;0.79) |
| 2012<br>(n=938) | <b>preop</b>  | 39 (37;40)    | 9 (7.7;11)    | 22 (21;23)    | 68 (66;69)          | 32 (31;34)       | 47 (46;49)     | 45 (42;48)       | 59 (58;60)       |
|                 | <b>year 1</b> | 77 (75;78)    | 64 (61;66)    | 63 (61;64)    | 71 (69;72)          | 59 (58;61)       | 83 (81;84)     | 79 (77;82)       | 77 (75;78)       |
|                 | <b>diff</b>   | 38 (36;40)    | 55 (52;57)    | 41 (39;43)    | 2.8 (1.5;4.2)       | 27 (25;28)       | 35 (33;37)     | 34 (31;37)       | 18 (16;19)       |
|                 | <b>srm</b>    | 1.4 (1.3;1.5) | 1.2 (1.1;1.3) | 1.4 (1.3;1.4) | 0.14 (0.072;0.2)    | 1 (0.93;1.1)     | 1.1 (0.99;1.2) | 0.65 (0.58;0.72) | 0.8 (0.72;0.87)  |
| 2013<br>(n=922) | <b>preop</b>  | 39 (38;41)    | 10 (8.7;12)   | 22 (21;23)    | 67 (66;68)          | 33 (32;34)       | 48 (46;49)     | 44 (41;47)       | 60 (59;62)       |
|                 | <b>year 1</b> | 77 (76;79)    | 63 (60;65)    | 62 (60;64)    | 70 (69;71)          | 59 (57;61)       | 83 (81;84)     | 79 (76;81)       | 77 (76;78)       |
|                 | <b>diff</b>   | 38 (36;40)    | 53 (49;56)    | 41 (38;42)    | 2.9 (1.6;4.2)       | 26 (24;28)       | 35 (33;37)     | 35 (32;38)       | 17 (16;19)       |
|                 | <b>srm</b>    | 1.4 (1.3;1.5) | 1.2 (1.1;1.3) | 1.4 (1.3;1.5) | 0.15 (0.082;0.21)   | 1 (0.94;1.1)     | 1.1 (1;1.2)    | 0.69 (0.62;0.76) | 0.77 (0.69;0.84) |
| 2014<br>(n=957) | <b>preop</b>  | 41 (39;42)    | 10 (8.9;12)   | 23 (22;24)    | 67 (65;68)          | 34 (33;35)       | 48 (46;50)     | 44 (41;47)       | 60 (58;61)       |
|                 | <b>year 1</b> | 76 (75;77)    | 61 (58;63)    | 61 (59;62)    | 67 (66;69)          | 58 (56;59)       | 80 (78;82)     | 73 (70;76)       | 76 (74;77)       |
|                 | <b>diff</b>   | 35 (33;37)    | 50 (48;53)    | 38 (36;39)    | 0.58 (-0.64;1.8)    | 24 (22;26)       | 32 (30;34)     | 29 (26;32)       | 16 (14;17)       |
|                 | <b>srm</b>    | 1.3 (1.2;1.4) | 1.1 (1;1.2)   | 1.3 (1.2;1.4) | 0.028 (-0.035;0.09) | 0.95 (0.87;1)    | 0.98 (0.9;1.1) | 0.57 (0.5;0.63)  | 0.7 (0.63;0.77)  |
| 2015<br>(n=916) | <b>preop</b>  | 41 (40;43)    | 10 (9;12)     | 21 (20;22)    | 66 (65;67)          | 33 (32;35)       | 48 (46;50)     | 43 (40;46)       | 61 (60;63)       |
|                 | <b>year 1</b> | 76 (74;77)    | 62 (59;65)    | 60 (59;62)    | 67 (66;69)          | 57 (56;59)       | 81 (79;82)     | 75 (72;77)       | 75 (73;76)       |
|                 | <b>diff</b>   | 34 (33;36)    | 52 (49;55)    | 39 (38;41)    | 1.6 (0.39;2.9)      | 24 (22;26)       | 33 (31;35)     | 31 (28;35)       | 14 (12;15)       |
|                 | <b>srm</b>    | 1.2 (1.2;1.3) | 1.1 (1.1;1.2) | 1.4 (1.3;1.5) | 0.082 (0.017;0.15)  | 0.94 (0.87;1)    | 1 (0.95;1.1)   | 0.6 (0.53;0.67)  | 0.62 (0.55;0.69) |
| 2016<br>(n=860) | <b>preop</b>  | 41 (39;42)    | 9.8 (8.2;11)  | 20 (19;21)    | 65 (64;67)          | 33 (31;34)       | 46 (44;47)     | 44 (40;47)       | 59 (58;60)       |
|                 | <b>year 1</b> | 77 (76;79)    | 62 (59;64)    | 61 (59;63)    | 67 (66;69)          | 58 (56;60)       | 81 (79;82)     | 74 (71;76)       | 75 (74;77)       |
|                 | <b>diff</b>   | 37 (35;38)    | 52 (49;55)    | 40 (39;42)    | 1.8 (0.49;3)        | 25 (23;27)       | 35 (33;38)     | 30 (27;34)       | 16 (15;18)       |
|                 | <b>srm</b>    | 1.4 (1.3;1.5) | 1.2 (1.1;1.3) | 1.5 (1.4;1.6) | 0.092 (0.025;0.16)  | 0.96 (0.88;1)    | 1.1 (1;1.2)    | 0.6 (0.52;0.67)  | 0.7 (0.63;0.78)  |

**Table S3** Accumulated preoperative and 1-year postoperative SF-36 data (mean and 95% CIs) for patients treated surgically for LSS without DS, LSS with DS, and LDH between 2007 and 2016 and norms for the Swedish general population (Sullivan M, Karlsson J, Taft C, Ware Jr JE. Swedish SF-36 manual and interpretation guide. 2nd ed. Gothenburg: Sahlgrenska University Hospital; 2002).

|                                                      | LSS with DS |            |                       | LSS without DS |            |                       | LDH        |            |                       |
|------------------------------------------------------|-------------|------------|-----------------------|----------------|------------|-----------------------|------------|------------|-----------------------|
|                                                      | Preop       | Year 1     | Swe norm <sup>1</sup> | Preop          | Year 1     | Swe norm <sup>1</sup> | Preop      | Year 1     | Swe norm <sup>2</sup> |
| <b>PF</b>                                            | 36 (36;37)  | 59 (58;60) | 72 (71;74)            | 37 (37;37)     | 58 (57;58) | 72 (71;74)            | 40 (39;40) | 77 (76;77) | 88 (87;89)            |
| <b>RP</b>                                            | 13 (12;14)  | 46 (45;48) | 65(62;68)             | 14 (13;14)     | 44 (43;44) | 65(62;68)             | 9.8 (9;10) | 62 (61;63) | 85 (84;87)            |
| <b>BP</b>                                            | 27 (27;28)  | 54 (54;55) | 69 (67;71)            | 29 (29;29)     | 53 (53;54) | 69 (67;71)            | 22 (22;22) | 62 (62;63) | 73 (72;75)            |
| <b>GH</b>                                            | 60 (59;60)  | 62 (62;63) | 66 (64;68)            | 60 (60;60)     | 60 (60;61) | 66 (64;68)            | 67 (67;67) | 69 (69;70) | 75 (74;76)            |
| <b>VT</b>                                            | 39 (38;39)  | 55 (54;56) | 69 (67;71)            | 40 (40;41)     | 54 (54;55) | 69 (67;71)            | 33 (33;34) | 59 (58;59) | 70 (68;71)            |
| <b>SF</b>                                            | 56 (55;57)  | 76 (75;76) | 86 (85;88)            | 58 (58;59)     | 75 (74;75) | 86 (85;88)            | 47 (47;48) | 82 (81;82) | 88 (87;89)            |
| <b>RE</b>                                            | 43 (41;44)  | 65 (63;66) | 77 (75;80)            | 42 (41;43)     | 62 (61;63) | 77 (75;80)            | 44 (43;45) | 77 (76;77) | 88 (86;89)            |
| <b>MH</b>                                            | 65 (65;66)  | 75 (74;75) | 81 (80;83)            | 66 (66;66)     | 74 (74;74) | 81 (80;83)            | 60 (60;61) | 76 (76;77) | 81 (80;82)            |
| <sup>1</sup> Ages 65-74.<br><sup>2</sup> Ages 45-54. |             |            |                       |                |            |                       |            |            |                       |

**Table S4a** Slopes (with 95% CIs) for the regression lines when the trends in SF-36 scores (cf. Fig. S1a) are analysed with linear regression (SF-36 score =  $a \times \text{Year} + b$  where  $a$  is the slope and  $b$  is the intercept) for patients treated for LSS with DS between 2007 and 2016. Boldface numbers indicate slopes where the 95% CIs exclude zero.

|           | <b>Preop</b>            | <b>Year 1</b>               | <b>Difference</b>           |
|-----------|-------------------------|-----------------------------|-----------------------------|
| <b>PF</b> | <b>0.52 (0.36;0.68)</b> | <b>0.36 (0.059;0.66)</b>    | -0.16 (-0.45;0.12)          |
| <b>RP</b> | <b>0.42 (0.12;0.71)</b> | <b>0.55 (0.11;0.98)</b>     | 0.13 (-0.54;0.8)            |
| <b>BP</b> | -0.12 (-0.37;0.13)      | <b>-0.22 (-0.38;-0.055)</b> | -0.098 (-0.38;0.18)         |
| <b>GH</b> | 0.045 (-0.24;0.33)      | 0.025 (-0.18;0.23)          | -0.02 (-0.21;0.17)          |
| <b>VT</b> | 0.16 (-0.12;0.43)       | -0.15 (-0.44;0.15)          | <b>-0.31 (-0.53;-0.083)</b> |
| <b>SF</b> | 0.21 (-0.081;0.5)       | -0.035 (-0.26;0.2)          | -0.25 (-0.66;0.17)          |
| <b>RE</b> | 0.48 (-0.16;1.1)        | <b>0.28 (0.0056;0.54)</b>   | -0.2 (-0.85;0.45)           |
| <b>MH</b> | 0.16 (-0.011;0.33)      | -0.018 (-0.19;0.16)         | -0.18 (-0.35;0.0022)        |

**Table S4b** Slopes (with 95% CIs) for the regression lines when the trends in SF-36 scores (cf. Fig. S1b) are analysed with linear regression (SF-36 score =  $a \times \text{Year} + b$  where  $a$  is the slope and  $b$  is the intercept) for patients treated for LSS without DS between 2007 and 2016. Boldface numbers indicate slopes where the 95% CIs exclude zero.

|           | <b>Preop</b>             | <b>Year 1</b>            | <b>Difference</b>    |
|-----------|--------------------------|--------------------------|----------------------|
| <b>PF</b> | <b>0.38 (0.22;0.53)</b>  | <b>0.41 (0.22;0.6)</b>   | 0.036 (-0.1;0.18)    |
| <b>RP</b> | 0.25 (-0.02;0.52)        | <b>0.49 (0.23;0.75)</b>  | 0.24 (-0.1;0.58)     |
| <b>BP</b> | -0.086 (-0.26;0.085)     | -0.024 (-0.17;0.12)      | 0.062 (-0.17;0.3)    |
| <b>GH</b> | 0.041 (-0.084;0.17)      | 0.052 (-0.11;0.22)       | 0.011 (-0.096;0.12)  |
| <b>VT</b> | 0.046 (-0.052;0.14)      | 0.11 (-0.082;0.3)        | 0.062 (-0.086;0.21)  |
| <b>SF</b> | <b>0.23 (0.083;0.38)</b> | <b>0.14 (0.012;0.27)</b> | -0.088 (-0.21;0.032) |
| <b>RE</b> | 0.18 (-0.11;0.47)        | 0.3 (-0.031;0.62)        | 0.12 (-0.22;0.45)    |
| <b>MH</b> | <b>0.2 (0.063;0.35)</b>  | 0.094 (-0.072;0.26)      | -0.11 (-0.28;0.057)  |

**Table S4c** Slopes (with 95% CIs) for the regression lines when the trends in SF-36 scores (cf. Fig. S1c) are analysed with linear regression (SF-36 score =  $a \times \text{Year} + b$  where  $a$  is the slope and  $b$  is the intercept) for patients treated for LDH between 2007 and 2016. Boldface numbers indicate slopes where the 95% CIs exclude zero.

|           | <b>Preop</b>                | <b>Year 1</b>                | <b>Difference</b>   |
|-----------|-----------------------------|------------------------------|---------------------|
| <b>PF</b> | 0.17 (-0.05;0.39)           | 0.021 (-0.15;0.19)           | -0.15 (-0.46;0.16)  |
| <b>RP</b> | 0.077 (-0.046;0.2)          | -0.097 (-0.3;0.1)            | -0.17 (-0.45;0.099) |
| <b>BP</b> | <b>-0.2 (-0.35;-0.055)</b>  | <b>-0.35 (-0.51;-0.19)</b>   | -0.14 (-0.39;0.1)   |
| <b>GH</b> | <b>-0.21 (-0.37;-0.046)</b> | <b>-0.29 (-0.56;-0.026)</b>  | -0.084 (-0.3;0.13)  |
| <b>VT</b> | -0.1 (-0.25;0.054)          | <b>-0.2 (-0.33;-0.066)</b>   | -0.098 (-0.37;0.18) |
| <b>SF</b> | -0.1 (-0.33;0.13)           | -0.17 (-0.39;0.043)          | -0.071 (-0.44;0.3)  |
| <b>RE</b> | -0.033 (-0.33;0.26)         | -0.36 (-0.85;0.14)           | -0.33 (-0.89;0.24)  |
| <b>MH</b> | -0.048 (-0.25;0.16)         | <b>-0.17 (-0.33;-0.0069)</b> | -0.12 (-0.41;0.17)  |



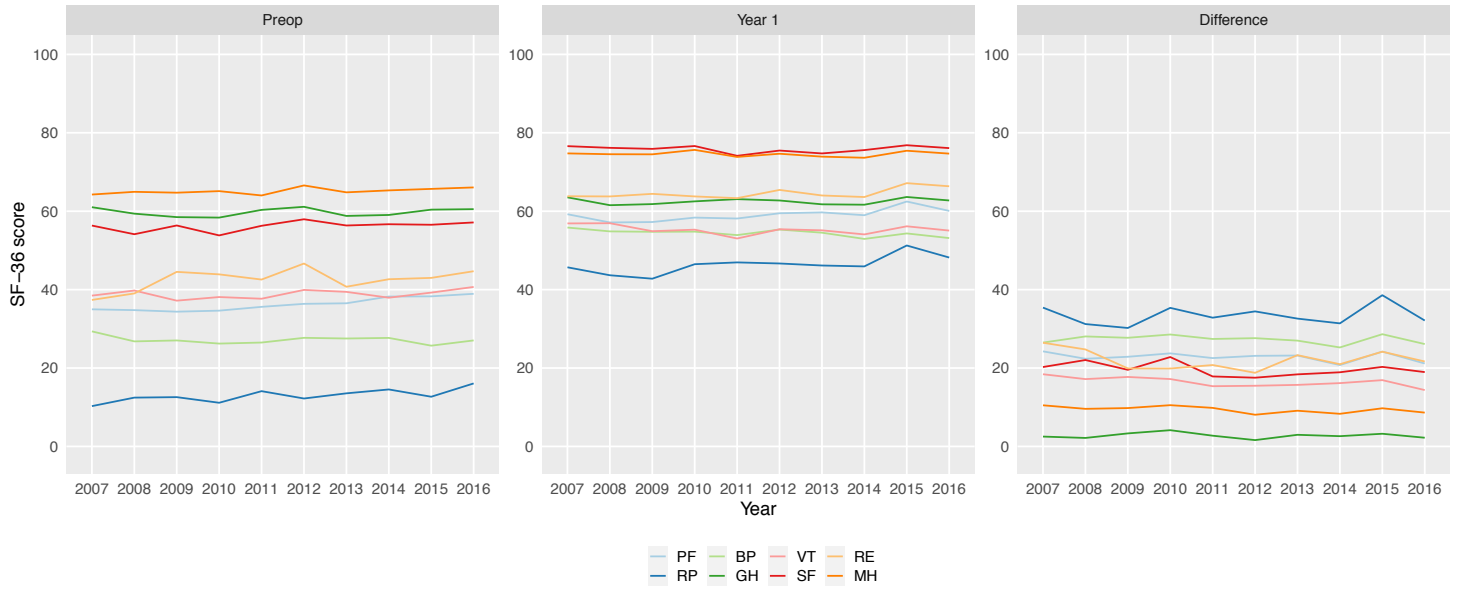

**Fig. S1a** Trends in SF-36 scores preoperatively and 1-year postoperatively for patients treated for LSS with DS between 2007 and 2016.

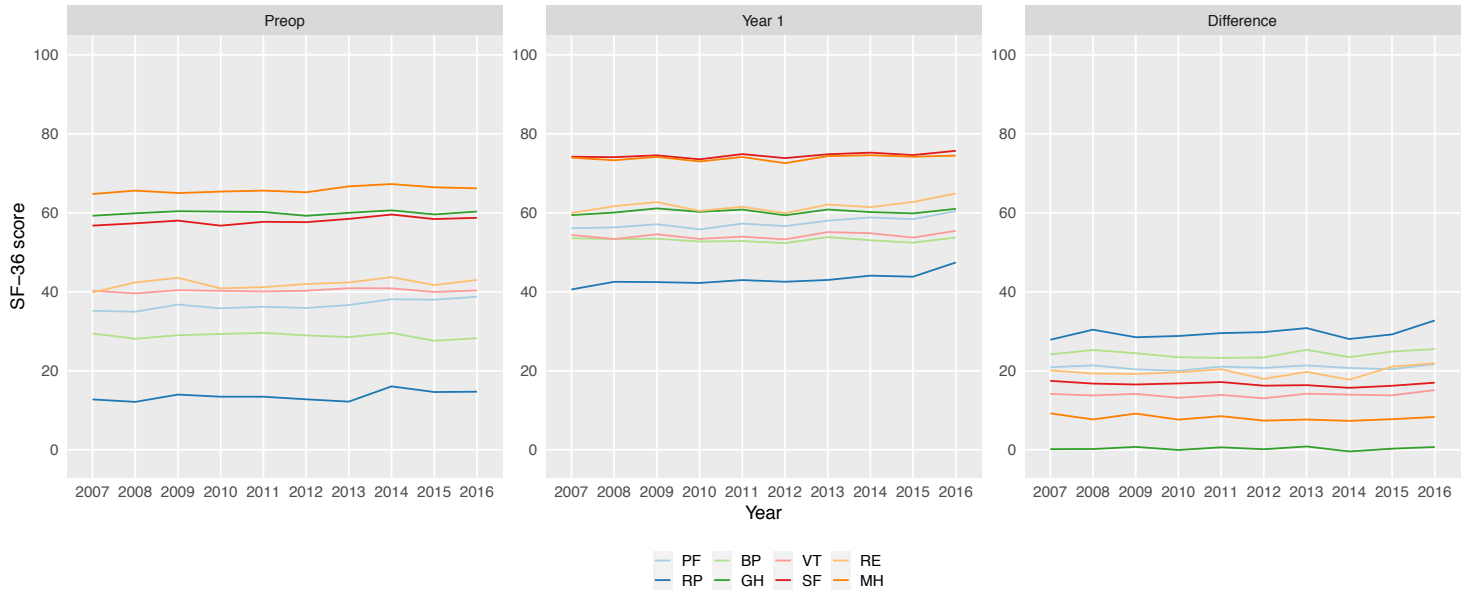

**Fig. S1b** Trends in SF-36 scores preoperatively and 1-year postoperatively for patients treated for LSS without DS between 2007 and 2016.

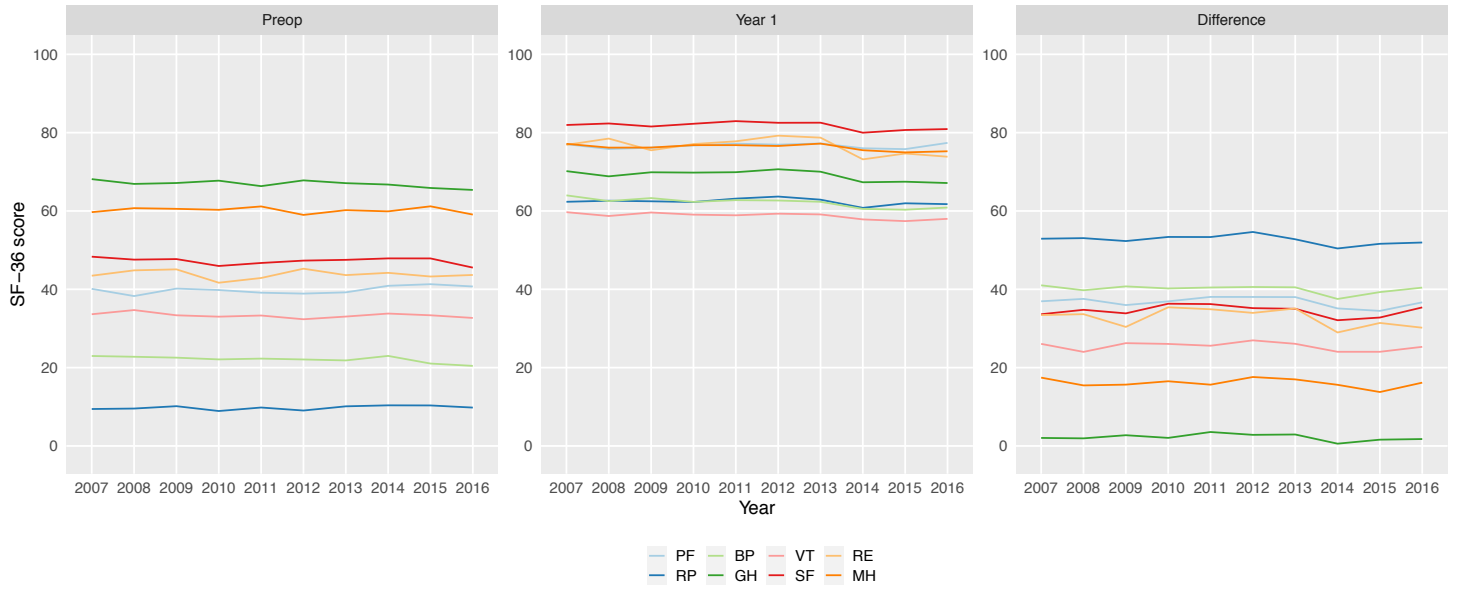

**Fig. S1c** Trends in SF-36 scores preoperatively and 1-year postoperatively for patients treated for LDH between 2007 and 2016.
